# Supplementary material
Source: PubMed Central journal article supplement (PMC8122853)
Supplement: NIHMS1684318-supplement-Supplementary_Material.pdf [file NIHMS1684318-supplement-Supplementary_Material.pdf]

**Cell Reports, Volume 33**

**Supplemental Information**

**Keratinocyte-Macrophage Crosstalk**

**by the Nrf2/Ccl2/EGF Signaling Axis**

**Orchestrates Tissue Repair**

**Alvaro Villarreal-Ponce, Melat Worku Tiruneh, Jasmine Lee, Christian F. Guerrero-Juarez, Joseph Kuhn, Joshua A. David, Kristen Dammeyer, Renee Mc Kell, Jennifer Kwong, Piul S. Rabbani, Qing Nie, and Daniel J. Ceradini**

FIGURE S1

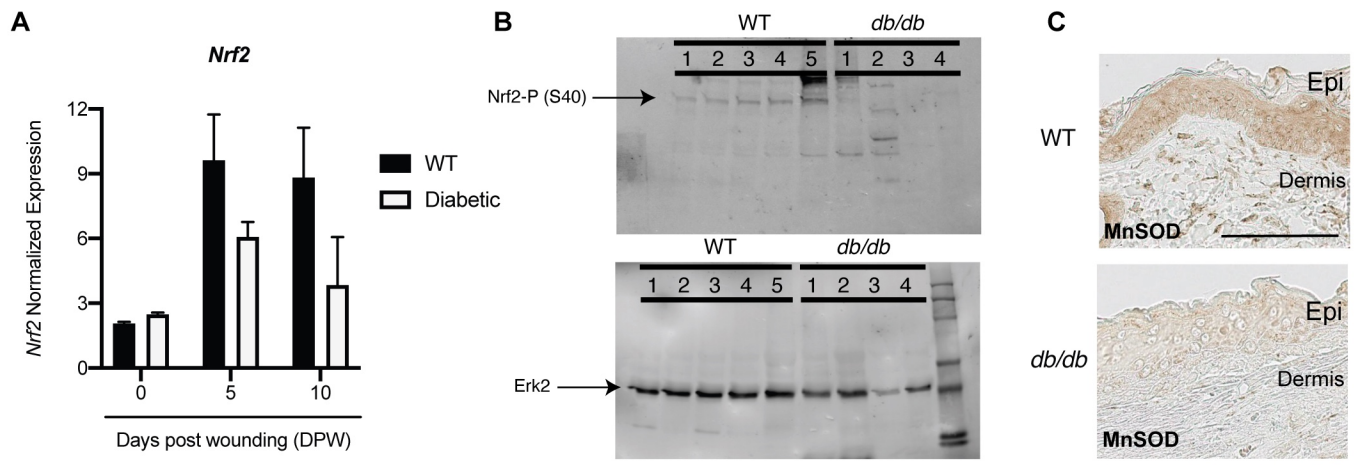

**Supplemental Figure 1. Dysfunctional activation of Nrf2 in diabetic wounds, Related to Figure 1**

**A.** qPCR of *Nrf2* in whole wounds belonging to WT and *db/db* mice at 10 DPW (n=3). Data was normalized to *18S* and is expressed as mean  $\pm$  SD.

**B.** Western Blot (WB) for active Nrf2 (Nrf2 S40-P) on whole wound lysates belonging to WT and *db/db* mice at 10 DPW (n=5,4). Erk2 is a loading control.

**C.** Representative immunohistochemical labeling of MnSOD expression in wounds belonging to WT and *db/db* mice at 10 DPW. MnSOD (brown). Scale, 100um. (n=3).

FIGURE S2

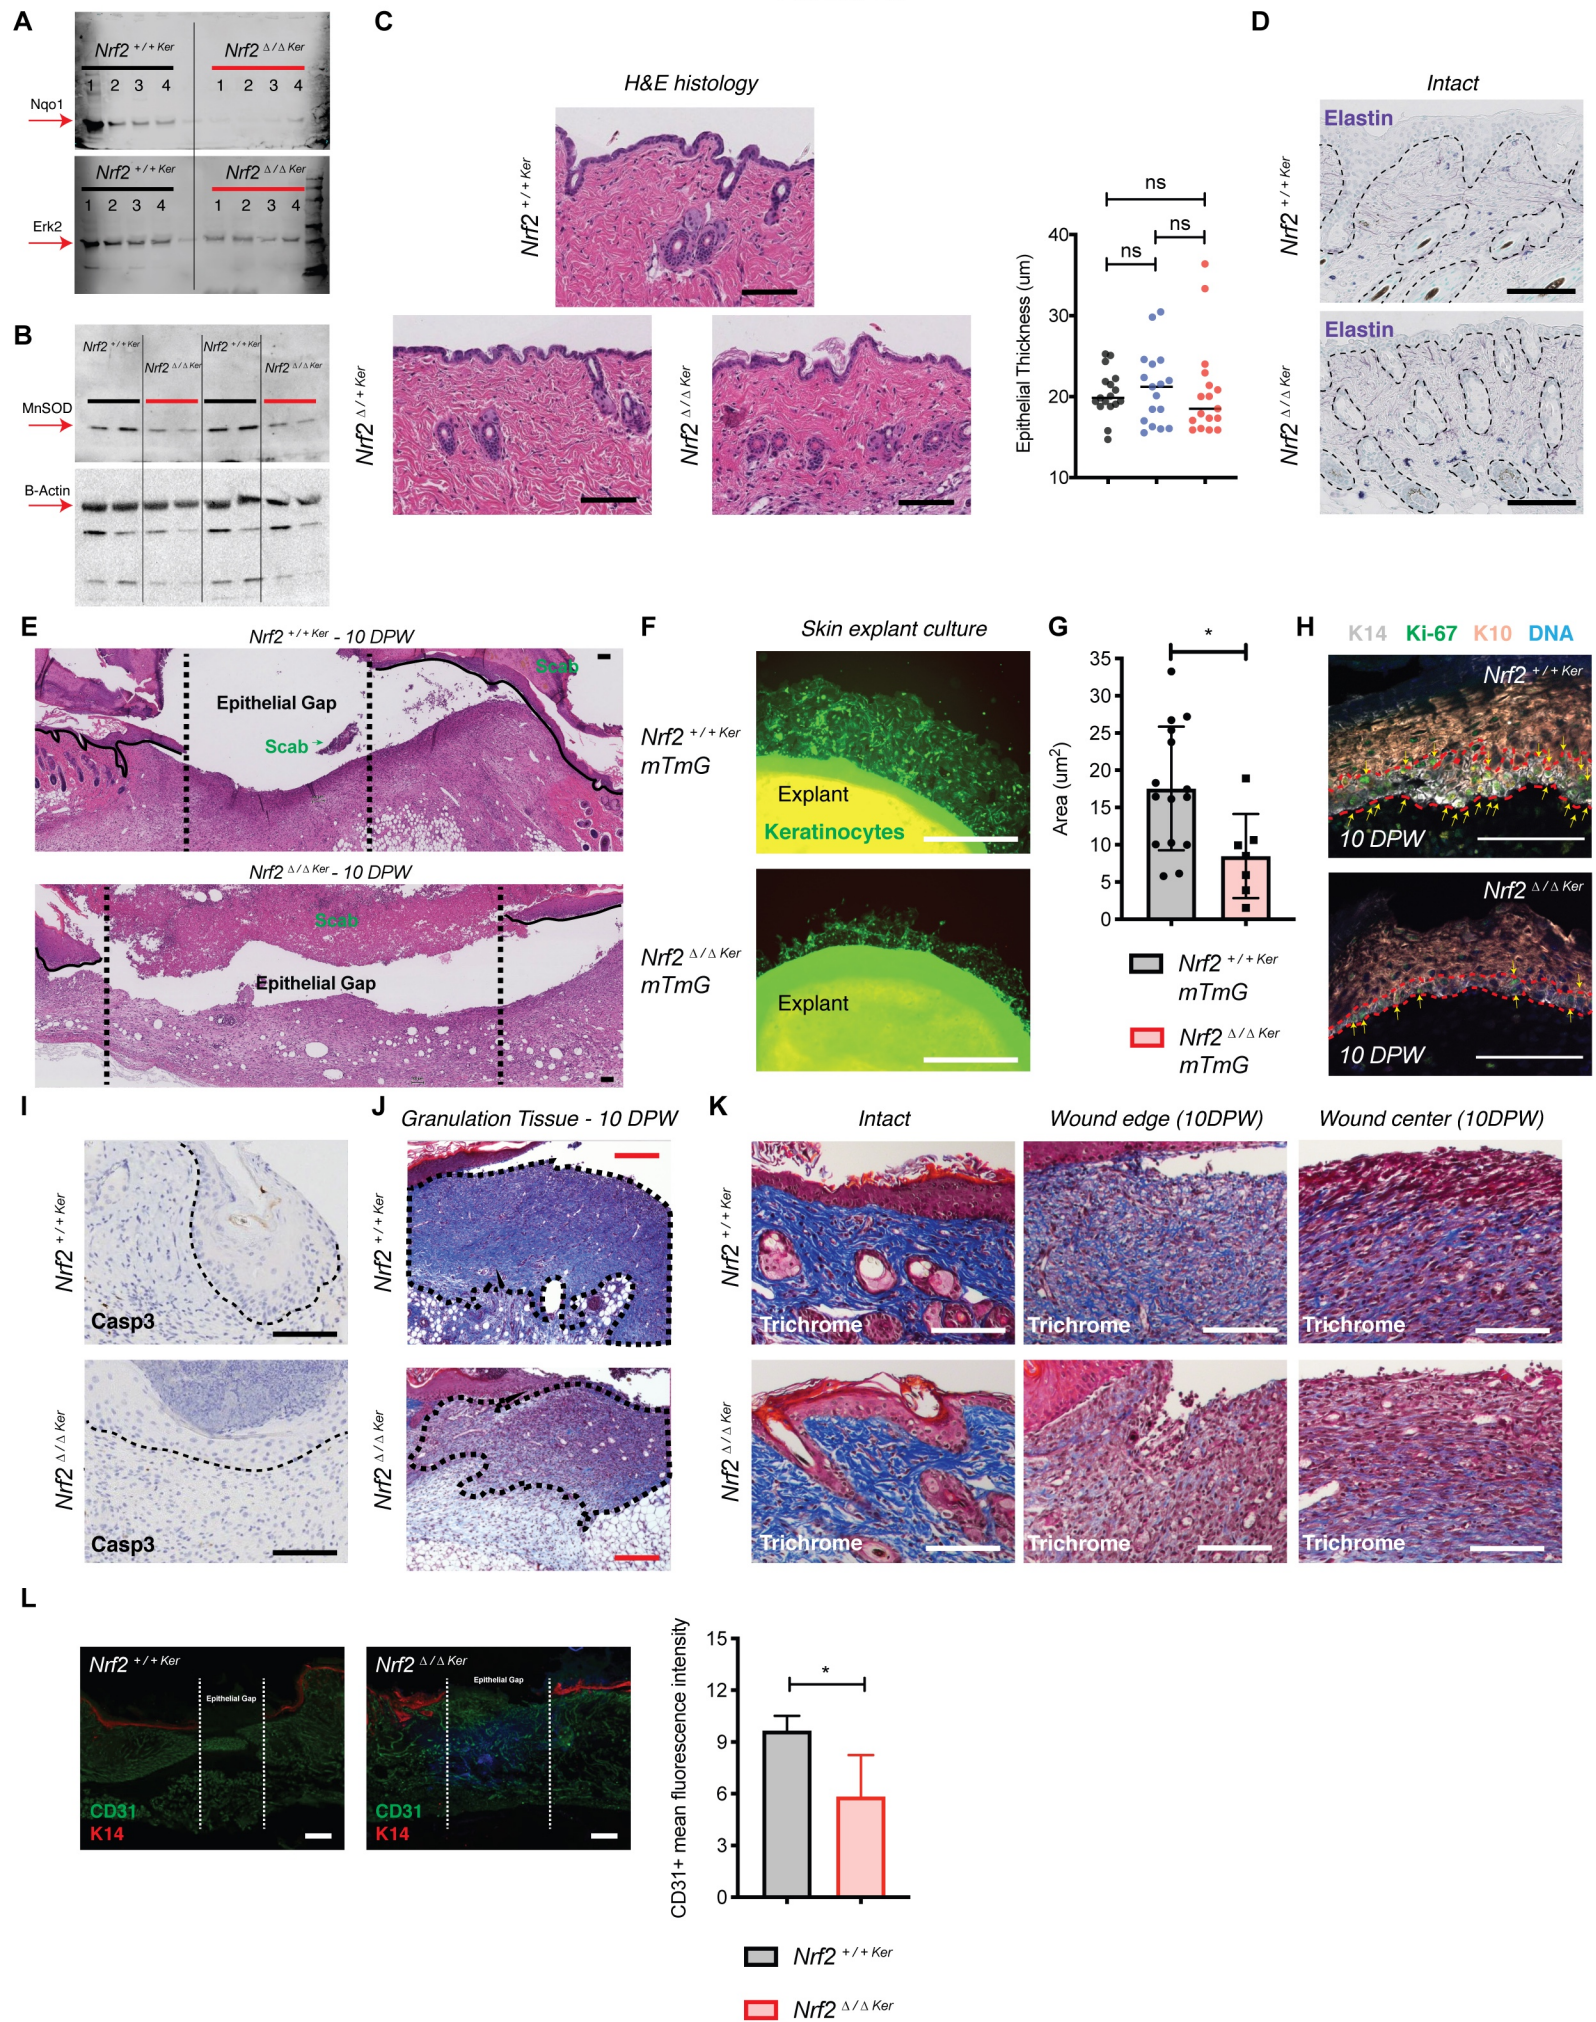

**Supplemental Figure 2. Acute Nrf2 Deletion in the basal epidermis affects keratinocyte and non-keratinocyte autonomous repair defects, Related to Figure 2**

- A.** WB for Nqo1 on whole wound lysates belonging to *Nrf2*<sup>Δ/+ Ker</sup> and *Nrf2*<sup>Δ/Δ Ker</sup> mice at 10 DPW (n=4). Erk2 is a loading control.
- B.** WB for MnSOD on whole wound lysates belonging to *Nrf2*<sup>Δ/+ Ker</sup> and *Nrf2*<sup>Δ/Δ Ker</sup> mice at 10 DPW (n=4). B-actin is a loading control.
- C.** Representative H&E images of intact skin belonging to tamoxifen-induced *Nrf2*<sup>+/+ Ker</sup>, *Nrf2*<sup>Δ/+ Ker</sup>, and *Nrf2*<sup>Δ/Δ Ker</sup> mice (n=3). Quantification of epithelial thickness (n=3). Scale, 100um.
- D.** Elastin staining in intact skin belonging to *Nrf2*<sup>Δ/+ Ker</sup> and *Nrf2*<sup>Δ/Δ Ker</sup> mice (n=3). Scale, 100um.
- E.** Representative images of epithelial gap in *Nrf2*<sup>+/+ Ker</sup> and *Nrf2*<sup>Δ/Δ Ker</sup> mice at 10 DPW. Measurements made on H&E sections are depicted in main figure. (n=13,15)
- F.** Representative images depicting migration distance traveled by GFP<sup>+</sup> keratinocytes in skin explants cultured ex vivo. 4mm circular skin biopsies were taken from intact skin belonging to R26<sup>mTmG/+</sup>; *Nrf2*<sup>+/+ Ker</sup> and R26<sup>mTmG/+</sup>; *Nrf2*<sup>Δ/Δ Ker</sup> mice (n=7).
- G.** Quantification of the migration distance traveled by GFP<sup>+</sup> keratinocytes in (F) (n=7). Area measurements (explant base to epithelial sheet edge) were taken from independent high-powered fields (20x) in independent biological replicates.
- H.** Representative images of Ki67<sup>+</sup> keratinocytes at the epithelial edge in *Nrf2*<sup>+/+ Ker</sup> and *Nrf2*<sup>Δ/Δ Ker</sup> wounds at 10 DPW (n=4). K14 (grey); Ki-67 (green); K10 (orange); DAPI (blue). Measurements made on H&E sections are depicted in main figure.
- I.** IF labeling of cleaved Caspase3 to demarcate apoptotic cells in basal keratinocytes of the epithelial edge in wounds belonging to *Nrf2*<sup>Δ/+ Ker</sup> and *Nrf2*<sup>Δ/Δ Ker</sup> mice at 10 DPW (n=3). Caspase3 (brown). Scale, 100um.
- J.** Representative images of the granulation tissue in *Nrf2*<sup>+/+ Ker</sup> and *Nrf2*<sup>Δ/Δ Ker</sup> wounds at 10 DPW. Measurements made on H&E sections are depicted in main figure. Scale, 200um. (n=11,8)
- K.** Trichrome staining of intact and wounded *Nrf2*<sup>Δ/+ Ker</sup> and *Nrf2*<sup>Δ/Δ Ker</sup> skin at 5 and 10 DPW (n =3,3) to assess collagen deposition and organization. Scale, 100um.
- L.** IF/quantification of CD31<sup>+</sup> vascular tissue the wounds belonging to *Nrf2*<sup>+/+ Ker</sup> and *Nrf2*<sup>Δ/Δ Ker</sup> mice at 10 DPW (n=3). CD31 (green) and K14 (red). Scale, 100px. Quantification of CD31<sup>+</sup> immunofluorescent labeling in wounds belonging to *Nrf2*<sup>+/+ Ker</sup> and *Nrf2*<sup>Δ/Δ Ker</sup> mice at 10 DPW (n=3). Labeling was quantified from independent high-powered fields (20x) in independent biological replicates.

All quantified data is represented as mean ± SD.

For (C), two-way ANOVA with multiple comparisons was used to analyze statistical significance of open wounds between groups on respective days post wounding. ns = not significant.

For (G) and (L), unpaired t-tests were used to analyze statistical significance between the two experimental groups. ns = not significant; \*p<0.05; \*\*\*p<0.001; \*\*\*\*p<0.0001.



FIGURE S3

A

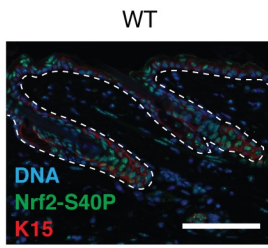

B

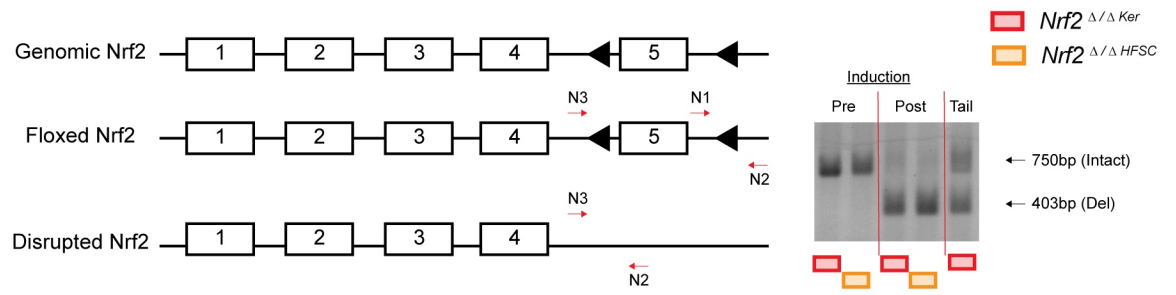

**Supplemental Figure 3. Nrf2 expression in HFSCs and recombination efficiency in transgenic animals, Related to Figure 2**

**A.** IF labeling of active Nrf2 in intact WT skin demonstrates its expression in Keratin 15 (K15)<sup>+</sup> hair follicle stem cells (HFSCs) (n=3). Active Nrf2 (Nrf2 S40-P) (green), K15 (red), and DAPI (blue). Scale, 100um.

**B.** Representative gel image of genotyping PCR showing the Nrf2 floxed locus before and after induced recombination in basal keratinocytes (lanes 1,3) and flow cytometry isolated *Nrf2*<sup>ΔΔ HFSC</sup> HFSCs (lanes 2,4) (n>3). Lane 5 is of PCR amplification from cell heterogenous tail DNA.

**FIGURE S4**

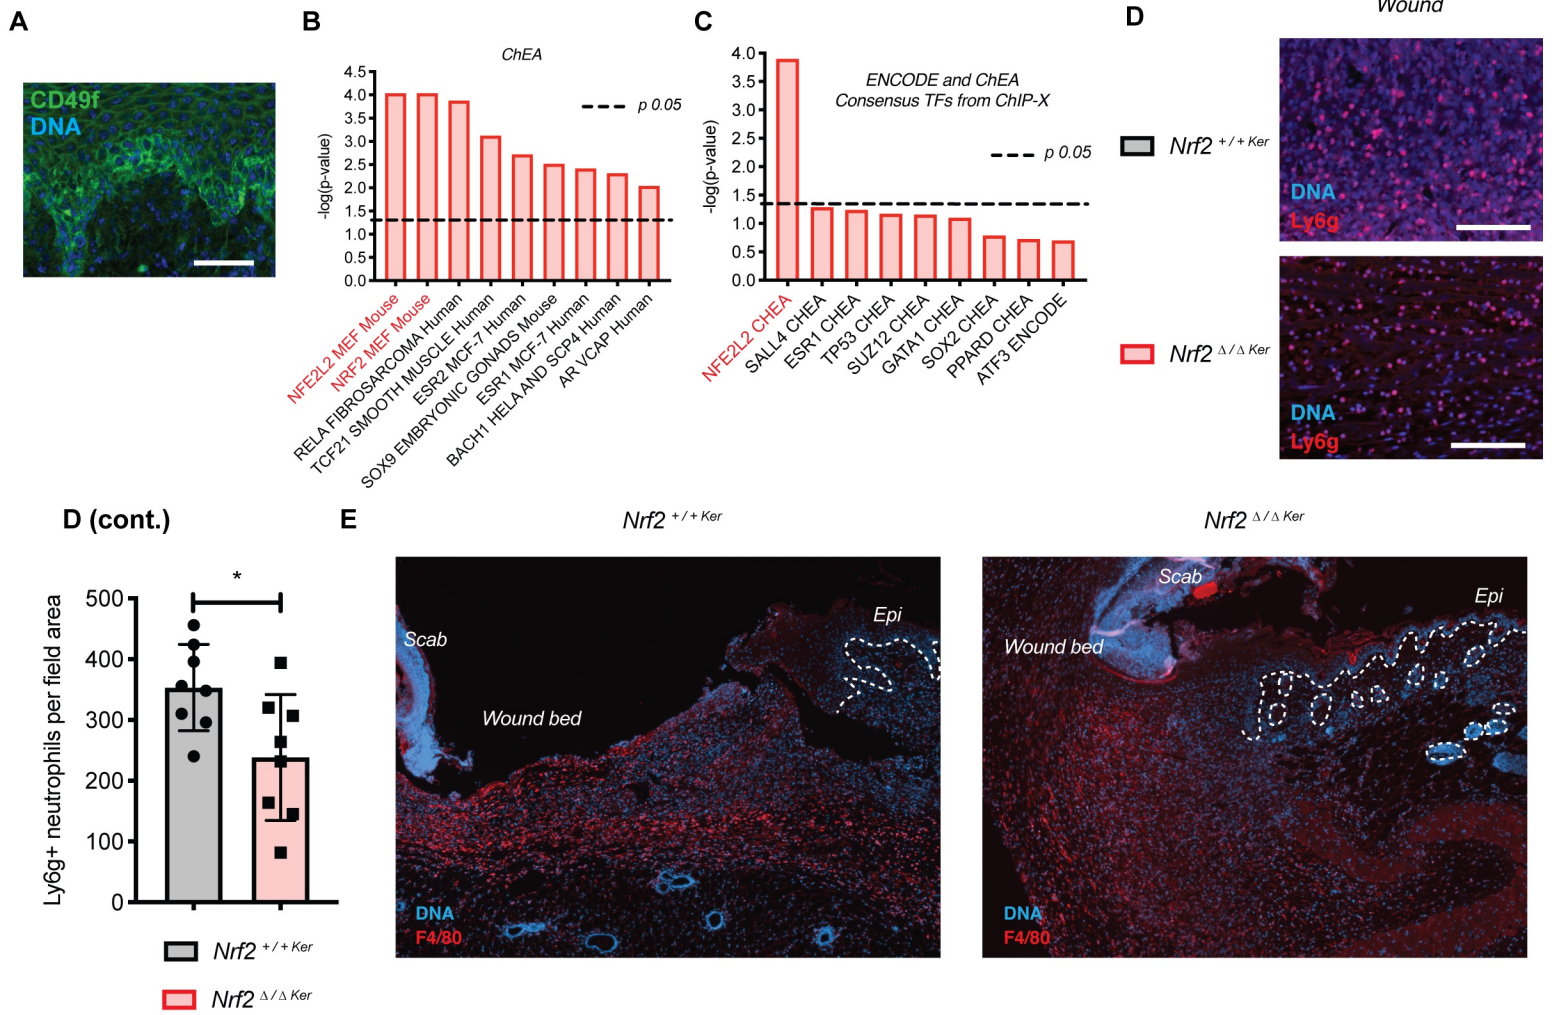



**Supplemental Figure 4. Epidermal Nrf2 deletion impairs keratinocyte-mediated signaling for immune cell trafficking during wound repair, Related to Figure 3**

- A.** Immunofluorescent labeling of CD49f in WT skin belonging demonstrate its specificity to the basal epidermis. CD49f (green), DAPI (blue). Scale, 50um.
- B.** EnrichR Chromatin immunoprecipitation enrichment analysis (ChEA) of bulk RNA-seq comparing DEGs in wound-associated keratinocytes from *Nrf2*<sup>+/+ Ker</sup> and *Nrf2*<sup>Δ/Δ Ker</sup> wounds at 5 DPW.
- C.** EnrichR ChIP-X analysis of bulk RNA-seq comparing DEGs in wound-associated keratinocytes from *Nrf2*<sup>+/+ Ker</sup> and *Nrf2*<sup>Δ/Δ Ker</sup> wounds at 5 DPW.
- D.** IF labeling of neutrophils trafficked into the wounds of *Nrf2*<sup>+/+ Ker</sup> and *Nrf2*<sup>Δ/Δ Ker</sup> mice at 2 DPW (n=10). Ly6g (red) and DAPI (blue). Scale, 100um. Quantification of Ly6g<sup>+</sup> immunofluorescent labeling in wounds belonging to *Nrf2*<sup>+/+ Ker</sup> and *Nrf2*<sup>Δ/Δ Ker</sup> mice at 2 DPW. Labeling was quantified from independent high-powered fields (20x) in independent biological replicates. The data is represented as mean ± SD and unpaired t-tests were used to analyze statistical significance between the two experimental groups. ns=not significant; \*p<0.05.
- E.** IF of macrophages trafficked into the wounds of *Nrf2*<sup>+/+ Ker</sup> and *Nrf2*<sup>Δ/Δ Ker</sup> mice at 5 DPW (n=10). F4/80 (red) and DAPI (blue). Scale, 100um.

FIGURE S5

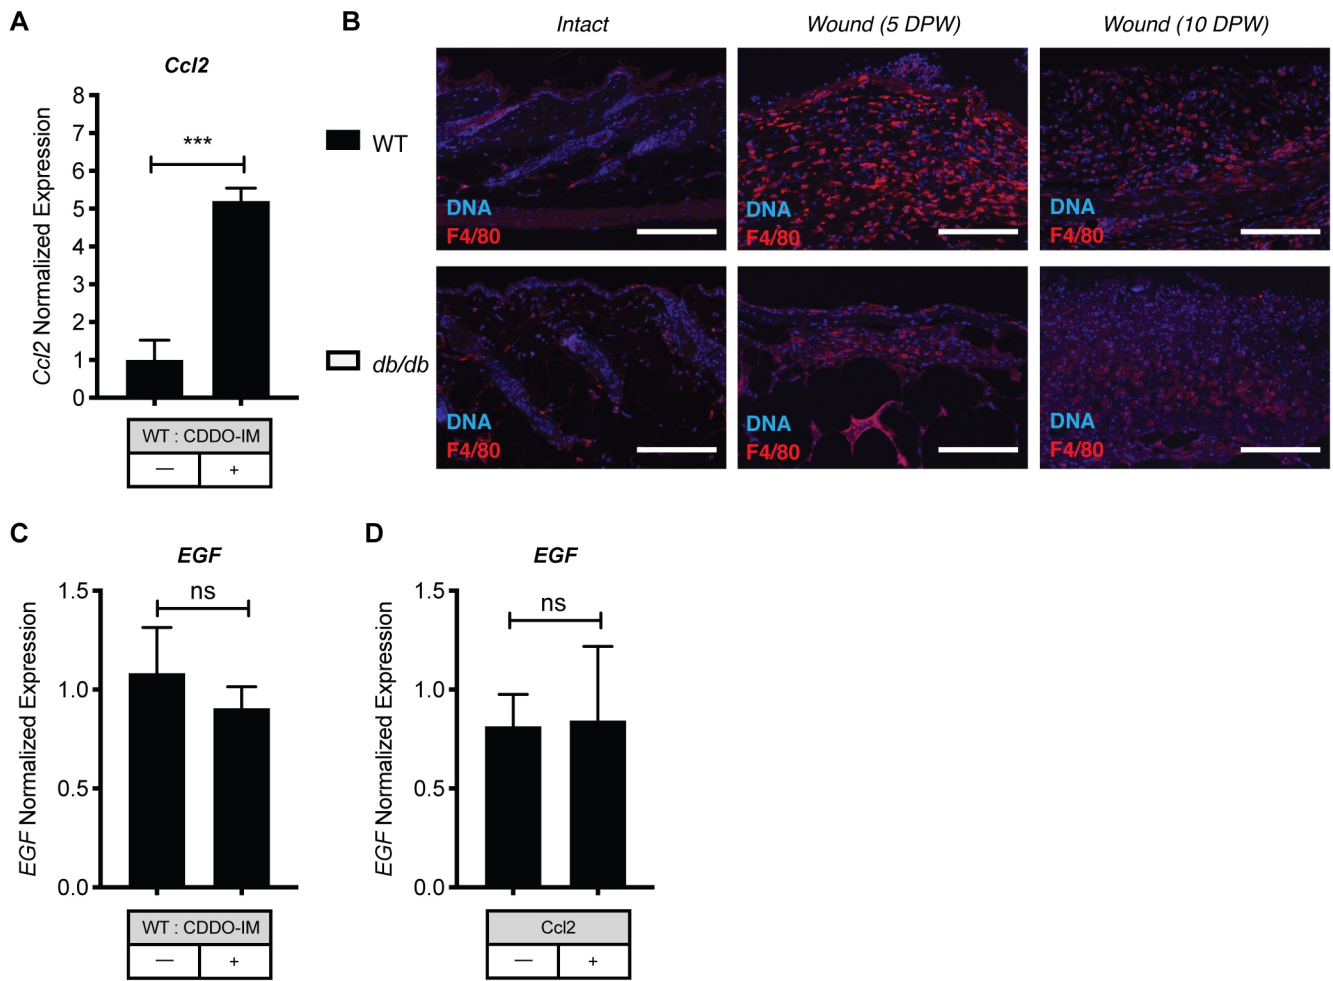

**Supplemental Figure 5. Macrophage trafficking dysfunction in diabetic mice and the effects of CDDO-IM, Ccl2 treatment in keratinocytes, Related to Figure 4 and 5**

**A.** qPCR of *Ccl2* in CDDO-IM treated WT keratinocytes. Data normalized to *18S* (n=3).

**B.** Immunofluorescent labeling of macrophages trafficked into the wounds of from WT and *db/db* mice at 0, 5, and 10 DPW (WT, *db/db*: n=4,3 (0 DPW), n=9,10 (5 DPW), n=7,7 (10 DPW). Paraffin sections (5um) were stained with antibodies against F4/80 (red) and DAPI (blue) as a nuclear counterstain. Scale bar, 100um.

**C.** qPCR of *EGF* in CDDO-IM treated WT keratinocytes. Data normalized to *18S* (n=3).

**D.** qPCR of *EGF* in WT keratinocytes after treatment with exogenous Ccl2. Data normalized to *18S* (n=3).

| Oligonucleotides (cont.)                     |                   |     |
|----------------------------------------------|-------------------|-----|
| EGF F<br>5'-GGAAGCCACGCTTACATTCAT-3'         | Life Technologies | N/A |
| EGF R<br>5'-ACTGAGTAGAAGATCCGATCACC-3'       | Life Technologies | N/A |
| Nqo1 F<br>5'-AGGATGGGAGGTACTCGAATC-3'        | Life Technologies | N/A |
| Nqo1 R<br>5'-AGGCGTCCTTCCTTATATGCTA-3'       | Life Technologies | N/A |
| Nrf2 F<br>5'-CACATTGGGATTCACGCATA-3'         | Life Technologies | N/A |
| Nrf2 R<br>5'-CCCCTGGAAGTGTCAAACAG-3'         | Life Technologies | N/A |
| Sod2 F<br>5'-GTGAAACCTCACTCACGGC-3'          | Life Technologies | N/A |
| Sod2 R<br>5'-ACAGCACCCCAGTCATAGTG-3'         | Life Technologies | N/A |
| Cre F<br>5'-TAAAGATATCTCACGTACTGACGGTG-3'    | Life Technologies | N/A |
| Cre R<br>5'-TCTCTGACCAGAGTCATCCTTAGC-3'      | Life Technologies | N/A |
| Nrf2 flox N1<br>5'-TCTTAGGCACCATTTGGGAGAG-3' | Life Technologies | N/A |
| Nrf2 flox N2<br>5'-TACAGCAGGCATACCATTGTGG-3' | Life Technologies | N/A |
| Nrf2 flox N3<br>5'-TGAGAGCTTCCCAGACTCACTT-3' | Life Technologies | N/A |
| Rosa F<br>5'-CGAGGCGGATCACAAGCAATA-3'        | Life Technologies | N/A |
| Rosa R<br>5'-TCAATGGGCGGGGTCGTT-3'           | Life Technologies | N/A |

**Table S1. Oligonucleotides used for qPCR and genotyping, Related to STAR Methods**
